# Supplementary material for: Exploring risk factors of short-term readmission in heart failure patients: A cohort study
Source: PubMed Central journal article supplement (PMC9742544; doi:10.3389/fendo.2022.1024759), 2022-11-28
Supplement: DataSheet_1.pdf [file DataSheet_1.pdf]

The difference of each index between the readmission group within 6 months and the non-readmission group within 6 months.

FREQUENCIES VARIABLES=BMI cr urea UA gfr RDWCV RDWSD HGB Ca K Na tg cholesterol ldlc hdlc  
 /NTILES=4  
 /STATISTICS=MEDIAN  
 /ORDER=ANALYSIS.

→ 频率

统计

|      | BMI        | cr       | urea    | UA       | gfr     | RDWCV   | RDWSD   | HGB      | Ca     | K      | Na       | tg     | cholesterol | ldlc   | hdlc   |
|------|------------|----------|---------|----------|---------|---------|---------|----------|--------|--------|----------|--------|-------------|--------|--------|
| 个案数  | 有效 1065    | 1065     | 1065    | 1065     | 1065    | 1065    | 1065    | 1065     | 1065   | 1065   | 1065     | 1065   | 1065        | 1065   | 1065   |
|      | 缺失 0       | 0        | 0       | 0        | 0       | 0       | 0       | 0        | 0      | 0      | 0        | 0      | 0           | 0      | 0      |
| 中位数  | 20.8889    | 83.1000  | 7.5700  | 444.0000 | 68.8400 | 14.4000 | 47.5000 | 118.0000 | 2.2800 | 3.8400 | 139.2000 | .9700  | 3.6300      | 1.7800 | 1.0800 |
| 百分位数 | 25 18.6643 | 63.0500  | 5.6700  | 352.0000 | 44.5100 | 13.5000 | 44.9000 | 102.0000 | 2.1700 | 3.4900 | 136.4000 | .7300  | 3.0300      | 1.3600 | .8550  |
|      | 50 20.8889 | 83.1000  | 7.5700  | 444.0000 | 68.8400 | 14.4000 | 47.5000 | 118.0000 | 2.2800 | 3.8400 | 139.2000 | .9700  | 3.6300      | 1.7800 | 1.0800 |
|      | 75 23.4566 | 115.6000 | 10.8600 | 557.0000 | 93.6200 | 15.5000 | 50.9000 | 133.0000 | 2.3900 | 4.2800 | 141.7000 | 1.2800 | 4.3650      | 2.3300 | 1.3100 |

频率表

BMI

频率

统计

|      | BMI        | cr       | urea    | UA       | gfr     | RDWCV   | RDWSD   | HGB      | Ca     | K      | Na       | tg     | cholesterol | ldlc   | hdlc   |
|------|------------|----------|---------|----------|---------|---------|---------|----------|--------|--------|----------|--------|-------------|--------|--------|
| 个案数  | 有效 662     | 662      | 662     | 662      | 662     | 662     | 662     | 662      | 662    | 662    | 662      | 662    | 662         | 662    | 662    |
|      | 缺失 0       | 0        | 0       | 0        | 0       | 0       | 0       | 0        | 0      | 0      | 0        | 0      | 0           | 0      | 0      |
| 中位数  | 20.3954    | 92.9000  | 8.6100  | 474.0000 | 58.0250 | 14.4000 | 48.1000 | 116.0000 | 2.3000 | 3.9000 | 138.8000 | .9100  | 3.4600      | 1.6900 | 1.0600 |
| 百分位数 | 25 18.3655 | 69.0750  | 6.2400  | 374.0000 | 39.1975 | 13.7000 | 45.4750 | 100.0000 | 2.1900 | 3.5775 | 135.5000 | .6900  | 2.8675      | 1.2600 | .8600  |
|      | 50 20.3954 | 92.9000  | 8.6100  | 474.0000 | 58.0250 | 14.4000 | 48.1000 | 116.0000 | 2.3000 | 3.9000 | 138.8000 | .9100  | 3.4600      | 1.6900 | 1.0600 |
|      | 75 23.4375 | 130.9250 | 12.3100 | 600.5000 | 83.0850 | 15.8000 | 52.1000 | 129.0000 | 2.4100 | 4.3700 | 141.0000 | 1.3100 | 4.2300      | 2.2000 | 1.3000 |

频率表

BMI

检验统计<sup>a</sup>

|            | BMI        | cr         | urea       | UA         | gfr        | RDWCV      | RDWSD      |
|------------|------------|------------|------------|------------|------------|------------|------------|
| 曼-惠特尼 U    | 334427.000 | 309290.000 | 306512.500 | 312759.500 | 306785.500 | 330461.000 | 323403.000 |
| 威尔科克森 W    | 553880.000 | 876935.000 | 874157.500 | 880404.500 | 526238.500 | 898106.000 | 891048.000 |
| Z          | -1.795     | -4.290     | -4.566     | -3.946     | -4.538     | -2.189     | -2.189     |
| 渐近显著性 (双尾) | .073       | .000       | .000       | .000       | .000       | .029       | .029       |

a. 分组变量: 分组

检验统计<sup>a</sup>

| RDWSD    | HGB        | Ca         | K          | Na         | tg         | cholesterol | ldlc       | hdlc       |
|----------|------------|------------|------------|------------|------------|-------------|------------|------------|
| 3403.500 | 325528.500 | 331905.000 | 326262.000 | 325332.500 | 335868.500 | 323653.000  | 324718.500 | 346428.500 |
| 1048.500 | 544981.500 | 899550.000 | 893907.000 | 544785.500 | 555321.500 | 543106.000  | 544171.500 | 565881.500 |
| -2.889   | -2.679     | -2.046     | -2.606     | -2.698     | -1.652     | -2.864      | -2.759     | -.604      |
| .004     | .007       | .041       | .009       | .007       | .099       | .004        | .006       | .546       |

信息区域

The difference of each index between the readmission group within 6 months and the non-readmission group within 3 months.

频率

统计

|         | BMI     | cr       | urea    | UA       | gr      | RDWCV   | RDWSD   | HGB      | Ca     | K      | Na       | tg     | cholesterol | ldlc   | hdlc   |
|---------|---------|----------|---------|----------|---------|---------|---------|----------|--------|--------|----------|--------|-------------|--------|--------|
| 个案数 有效  | 1309    | 1309     | 1309    | 1309     | 1309    | 1309    | 1309    | 1309     | 1309   | 1309   | 1309     | 1309   | 1309        | 1309   | 1309   |
| 缺失      | 0       | 0        | 0       | 0        | 0       | 0       | 0       | 0        | 0      | 0      | 0        | 0      | 0           | 0      | 0      |
| 中位数     | 20.8209 | 84.6000  | 7.6200  | 442.0000 | 67.8800 | 14.3000 | 47.6000 | 118.0000 | 2.2900 | 3.8400 | 139.2000 | .9600  | 3.6200      | 1.7700 | 1.0800 |
| 百分位数 25 | 18.6090 | 63.7500  | 5.7500  | 354.5000 | 43.9400 | 13.6000 | 45.0000 | 102.0000 | 2.1800 | 3.5000 | 136.4000 | .7100  | 3.0200      | 1.3400 | .8700  |
| 50      | 20.8209 | 84.6000  | 7.6200  | 442.0000 | 67.8800 | 14.3000 | 47.6000 | 118.0000 | 2.2900 | 3.8400 | 139.2000 | .9600  | 3.6200      | 1.7700 | 1.0800 |
| 75      | 23.5556 | 116.6500 | 10.9750 | 556.5000 | 92.2400 | 15.5000 | 50.9000 | 132.0000 | 2.4000 | 4.2700 | 141.6500 | 1.2900 | 4.3300      | 2.3050 | 1.3200 |

频率表

BMI

| 频率 | 百分比 | 有效百分比 | 累计百分比 |
|----|-----|-------|-------|
|----|-----|-------|-------|

频率

统计

|         | BMI     | cr       | urea    | UA       | gr      | RDWCV   | RDWSD   | HGB      | Ca     | K      | Na       | tg     | cholesterol | ldlc   | hdlc   |
|---------|---------|----------|---------|----------|---------|---------|---------|----------|--------|--------|----------|--------|-------------|--------|--------|
| 个案数 有效  | 418     | 418      | 418     | 418      | 418     | 418     | 418     | 418      | 418    | 418    | 418      | 418    | 418         | 418    | 418    |
| 缺失      | 0       | 0        | 0       | 0        | 0       | 0       | 0       | 0        | 0      | 0      | 0        | 0      | 0           | 0      | 0      |
| 中位数     | 20.2604 | 98.9000  | 9.1300  | 486.5000 | 55.9600 | 14.6000 | 48.4000 | 115.0000 | 2.2900 | 3.9200 | 138.3500 | .9200  | 3.4350      | 1.6550 | 1.0600 |
| 百分位数 25 | 18.3412 | 70.4750  | 6.4050  | 384.0000 | 37.2750 | 13.8000 | 45.6000 | 99.0000  | 2.1900 | 3.6200 | 135.0000 | .7000  | 2.8325      | 1.2500 | .8400  |
| 50      | 20.2604 | 98.9000  | 9.1300  | 486.5000 | 55.9600 | 14.6000 | 48.4000 | 115.0000 | 2.2900 | 3.9200 | 138.3500 | .9200  | 3.4350      | 1.6550 | 1.0600 |
| 75      | 22.8928 | 135.9000 | 13.1975 | 627.0000 | 81.0375 | 15.9000 | 52.8000 | 128.0000 | 2.3900 | 4.4100 | 141.0000 | 1.3325 | 4.1625      | 2.1825 | 1.2625 |

频率表

检验统计<sup>a</sup>

|            | BMI        | cr          | urea        | UA          | gr         | RDWCV       | RDWSD       | HGB        | Ca          | K           |
|------------|------------|-------------|-------------|-------------|------------|-------------|-------------|------------|-------------|-------------|
| 曼-惠特尼 U    | 254927.500 | 235819.000  | 228207.000  | 233317.500  | 233064.500 | 244446.500  | 243895.000  | 250472.000 | 270018.000  | 246747.500  |
| 威尔科克森 W    | 342498.500 | 1093214.000 | 1085602.000 | 1090712.500 | 320635.500 | 1101841.500 | 1101290.000 | 338043.000 | 1127413.000 | 1104142.500 |
| Z          | -2.102     | -4.254      | -5.112      | -4.536      | -4.564     | -3.283      | -3.344      | -2.604     | -.401       | -3.023      |
| 渐近显著性 (双尾) | .036       | .000        | .000        | .000        | .000       | .001        | .001        | .009       | .688        | .003        |

a. 分组变量: 分组

检验统计<sup>a</sup>

| DWCV     | RDWSD       | HGB        | Ca          | K           | Na         | tg         | cholesterol | ldlc       | hdlc       |
|----------|-------------|------------|-------------|-------------|------------|------------|-------------|------------|------------|
| 4446.500 | 243895.000  | 250472.000 | 270018.000  | 246747.500  | 238343.500 | 268756.500 | 248131.500  | 250719.000 | 258676.500 |
| 1841.500 | 1101290.000 | 338043.000 | 1127413.000 | 1104142.500 | 325914.500 | 356327.500 | 335702.500  | 338290.000 | 346247.500 |
| -3.283   | -3.344      | -2.604     | -.401       | -3.023      | -3.970     | -.544      | -2.867      | -2.576     | -1.679     |
| .001     | .001        | .009       | .688        | .003        | .000       | .587       | .004        | .010       | .093       |

信息区域
